# Supplementary material
Source: HighWire-hosted journal article supplement (https://jama.ama-assn.org/content/suppl/2008/12/10/300.15.1836)
Supplement: pdfpat101508.pdf [file pdfpat101508.pdf]

# Prueba de esfuerzo cardíaco

La enfermedad **cardiovascular** (corazón y vasos sanguíneos) es la causa principal de muerte en los países desarrollados. Evaluar la función cardíaca y examinar la gravedad de la enfermedad de las **arterias coronarias** (los vasos sanguíneos del corazón) son los objetivos de la prueba de esfuerzo cardíaco. Someter el corazón a un mayor esfuerzo, como con ejercicio o determinados medicamentos, hace que este deba trabajar más. En estas condiciones, se puede producir **isquemia miocárdica** (disminución del flujo de sangre al músculo cardíaco). Como parte de una evaluación para detectar la enfermedad cardiovascular en una persona con dolor de pecho (además de un **electrocardiograma [ECG]**), la prueba de esfuerzo cardíaco puede ser útil para determinar la necesidad de realizar pruebas invasivas, como la **angiografía coronaria**, una visualización de las arterias coronarias después de inyectar colorante a través de un **catéter cardíaco** (conducto que se inserta en el corazón). El número de *JAMA* del 15 de octubre de 2008 incluye un artículo acerca de la prueba de esfuerzo cardíaco.

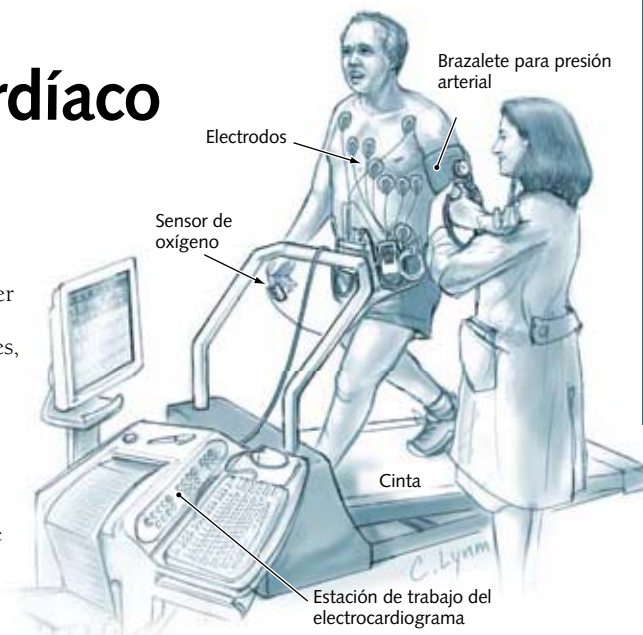

## TIPOS DE PRUEBAS DE ESFUERZO CARDÍACO

- Las pruebas de esfuerzo con ejercicio utilizan monitoreo cardíaco mientras la persona camina en una cinta con una pendiente en aumento. Los técnicos miden la frecuencia cardíaca, el tiempo que se caminó en la cinta y el esfuerzo realizado durante la prueba, y el médico busca detectar cambios en el ECG.
- Las pruebas de esfuerzo nucleares utilizan la inyección de un **radionúclido** (compuesto que contiene una pequeña cantidad de radioactividad) para rastrear el flujo de sangre y el patrón de isquemia cuando el corazón es sometido a un mayor esfuerzo (ya sea con ejercicio o con un medicamento).
- Las pruebas de esfuerzo farmacológicas, utilizadas generalmente para personas que pueden caminar únicamente distancias cortas, utilizan fármacos que someten el músculo cardíaco a un mayor esfuerzo. Un ECG y otros monitores cardíacos registran datos, incluidos la frecuencia y el ritmo cardíaco. Los cambios en el ECG y/o las pruebas cardíacas de detección por imágenes pueden indicar isquemia.
- Las **ecocardiografías** (que utilizan ondas sonoras para observar las estructuras cardíacas y el flujo de sangre en las cavidades cardíacas) pueden combinarse con pruebas de esfuerzo para examinar la función del corazón en reposo y en condiciones de esfuerzo.

## MOTIVOS POR LOS QUE SE REALIZA UNA PRUEBA DE ESFUERZO

- Las personas que tienen síntomas de enfermedad cardíaca deben ser evaluadas por su médico y es posible que sea necesario realizarles una prueba de esfuerzo. Los síntomas de trastornos cardíacos incluyen dolor en el pecho, el brazo o la mandíbula (**angina**); falta de aliento; hinchazón de la parte inferior de las piernas y de los pies; **palpitaciones** (frecuencia cardíaca irregular); y agotamiento o náuseas inexplicables. Lamentablemente, la muerte cardíaca súbita es, por lo general, el primer signo de que una persona tiene enfermedad cardíaca. Es posible que las mujeres con enfermedad cardíaca no siempre muestren los signos típicos de dolor en el pecho o en el brazo izquierdo. En ocasiones, el dolor en la parte superior del abdomen, especialmente en personas mayores con factores de riesgo de enfermedad cardíaca, puede ser un síntoma de enfermedad cardíaca.
- En ocasiones, se recomienda a las personas sedentarias que planifiquen comenzar un programa de ejercicios vigoroso que se sometan a una prueba de esfuerzo antes de dar inicio al nuevo régimen.

Fuentes: American Heart Association; National Heart, Lung, and Blood Institute; American College of Cardiology

Janet M. Torpy, MD, Redactora

Cassio Lynn, MA, Ilustrador

Richard M. Glass, MD, Editor

La Hoja para el Paciente de JAMA es un servicio al público de JAMA. La información y las recomendaciones que aparecen en esta hoja son adecuadas en la mayoría de los casos, pero no reemplazan el diagnóstico médico. Para obtener información específica relacionada con su afección médica personal, JAMA le sugiere que consulte a su médico. Los médicos y otros profesionales de atención médica pueden fotocopiar esta hoja con fines no comerciales, para compartirla con los pacientes. Para comprar reimpresiones en grandes cantidades, llame al 312/464-0776.

## PARA OBTENER MÁS INFORMACIÓN

- National Heart, Lung, and Blood Institute (Instituto Nacional del Corazón, los Pulmones y la Sangre)  
[www.nhlbi.nih.gov](http://www.nhlbi.nih.gov)
- American Heart Association (Asociación Americana del Corazón)  
[www.americanheart.org](http://www.americanheart.org)
- American College of Cardiology (Colegio Americano de Cardiología)  
[www.acc.org](http://www.acc.org)

## INFÓRMASE

Para encontrar esta y otras Hojas para el Paciente de JAMA anteriores, vaya al índice de Patient Page (Hoja para el Paciente) del sitio web de JAMA en [www.jama.com](http://www.jama.com). Muchas se encuentran disponibles en inglés, español y francés. En el número del 30 de enero de 2008, se publicó una Hoja para el Paciente sobre infarto de miocardio; en el número del 11 de febrero de 2004, se publicó una sobre intervención coronaria percutánea; en el número del 2 de julio de 2008, se publicó una sobre síndromes coronarios agudos; en el número del 4 de enero de 2006, se publicó una sobre paro cardíaco; en el número del 13 de septiembre de 2006, se publicó una sobre electrocardiogramas; y en el número del 13 de junio de 2007, se publicó una sobre insuficiencia cardíaca.

**JAMA**  
COPIA PARA  
SUS PACIENTES
